# Supplementary material
Source: PubMed Central journal article supplement (PMC2832156)

# Suppl. Figure 1

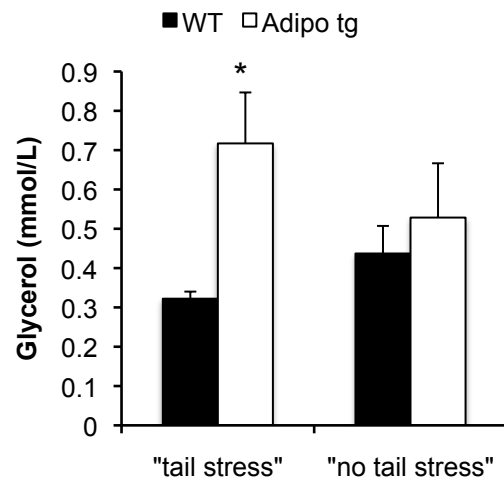

Supplement: mmc1.pdf [file mmc1.pdf]

## Suppl. Figure 2

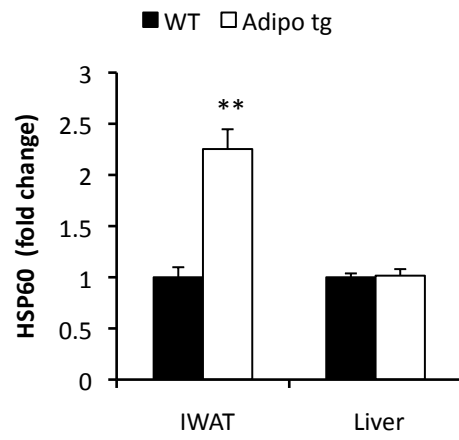

Supplement: mmc2.pdf [file mmc2.pdf]

# Suppl. Figure 3

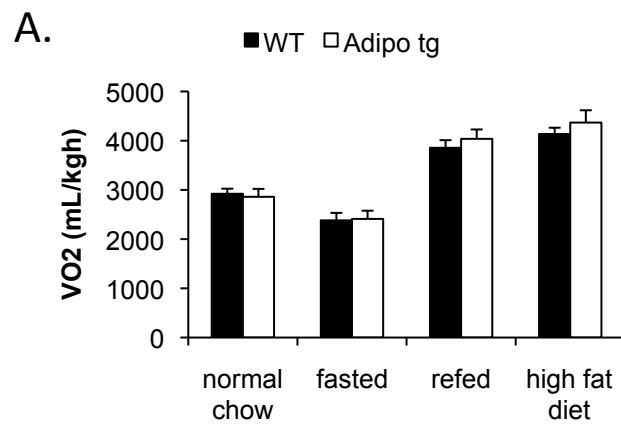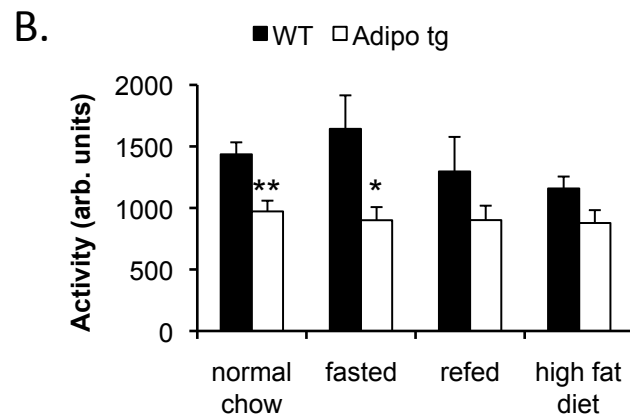

Supplement: mmc3.pdf [file mmc3.pdf]
